# Supplementary material
Source: PubMed Central journal article supplement (PMC2729186)

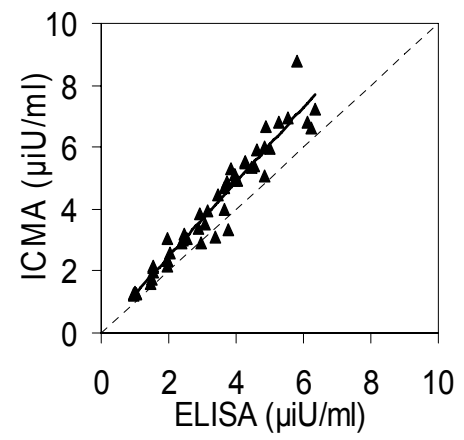

Supplement: jcem_jc.2006-2300_2.pdf [file jcem_jc.2006-2300_2.pdf]

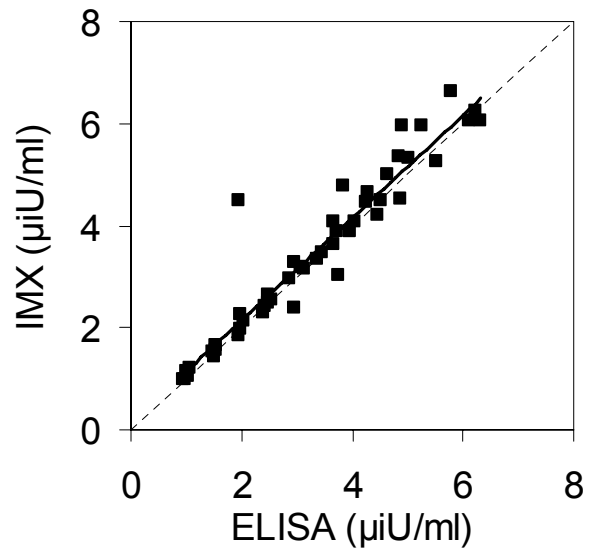

Supplement: jcem_jc.2006-2300_3.pdf [file jcem_jc.2006-2300_3.pdf]
